# Supplementary material
Source: publisher site journal article supplement (https://www.dovepress.com/article/435301)
Supplement: Supplementary file 1 [file get_supplementary_file.php]

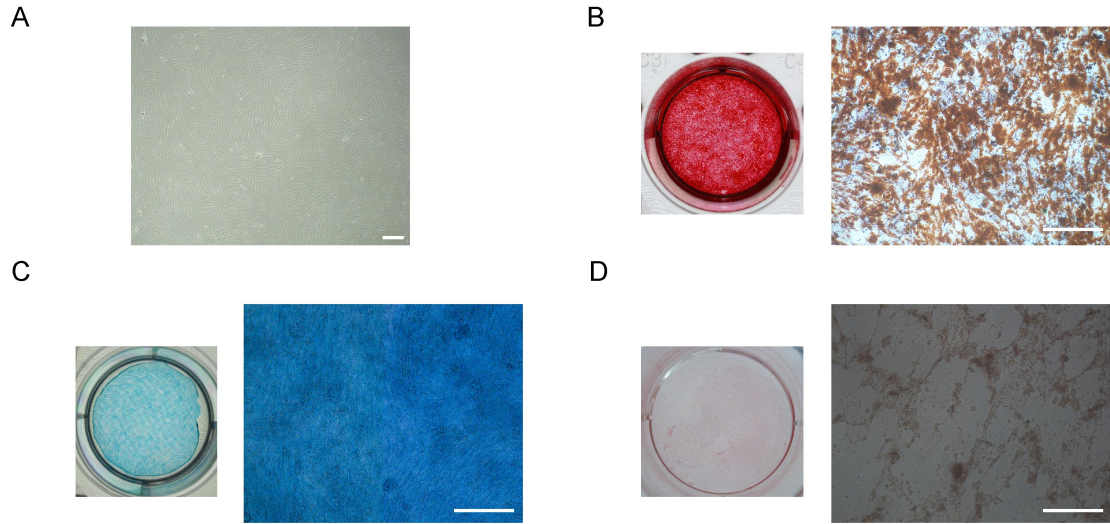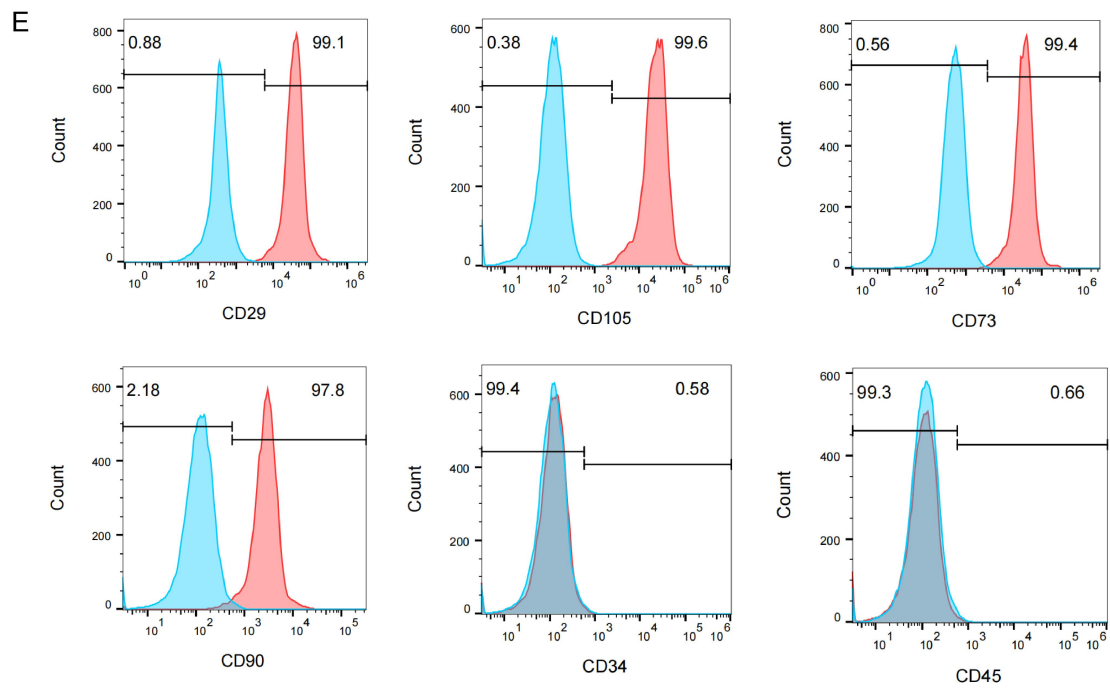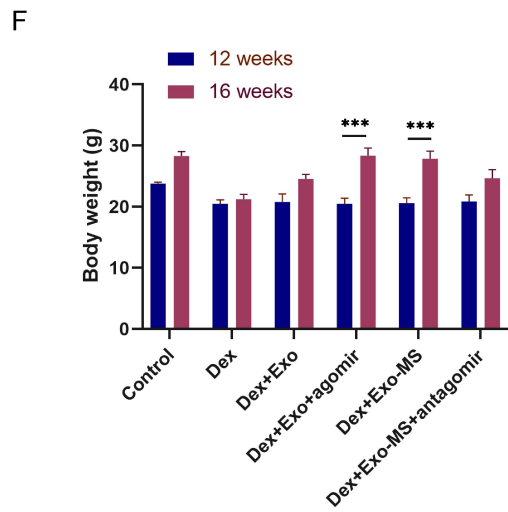

**Figure S1 Characterization of BMSCs and body weight of experimental mice.**

(A) BMSCs were observed under a microscope (scale bar = 200  $\mu\text{m}$ ). (B) Alizarin red staining was performed (scale bar = 100  $\mu\text{m}$ ). (C) Alcian blue staining solution for cartilage (scale bar = 100  $\mu\text{m}$ ). (D) Oil red O solution was used for staining (scale bar = 100  $\mu\text{m}$ ). (E) Flow cytometry was employed to assess the expression of surface markers on BMSCs, including positive markers CD29, CD105, CD73, CD90, and negative markers CD34, CD45. Blue histograms: BMSCs stained with control antibody; Red histograms: BMSCs stained with antibodies against cell surface antigens. Percentiles indicate the average of each antigen. (F) body weight of experimental mice. 12 weeks: Body weights of 8-week-old mice after 4 weeks of dexamethasone modeling in six different groups. 16 weeks: Body weights of the same six groups of mice after 4 weeks of various experimental conditions. The data are expressed as the mean  $\pm$  SD (n = 3); \*\*\*p < 0.001.
